# Supplementary material
Source: PubMed Central journal article supplement (PMC6761003)
Supplement: NIHMS1537613-supplement-Supplemental_Material.pdf [file NIHMS1537613-supplement-Supplemental_Material.pdf]

SUPPLEMENTAL MATERIALS

**Regulation of Stress Granule Formation by Inflammation, Vascular Injury, and Atherosclerosis**

Allison B. Herman<sup>1</sup>, Milessa Silva Afonso<sup>2</sup>, Sheri E. Kelemen<sup>1</sup>, Mitali Ray<sup>1</sup>, Christine N. Vrakas<sup>1</sup>, Amy C Burke<sup>2</sup>, Rosario G. Scalia<sup>1</sup>, Kathryn Moore<sup>2\*</sup>, Michael V. Autieri<sup>1\*</sup>

<sup>1</sup>Department of Physiology  
Independence Blue Cross Cardiovascular Research Center  
Lewis Katz School of Medicine at Temple University  
Philadelphia, PA 19140

<sup>2</sup>New York University Langone Health  
Leon H Charney Division of Cardiology  
New York, NY 10016

## Supplementary Figure I

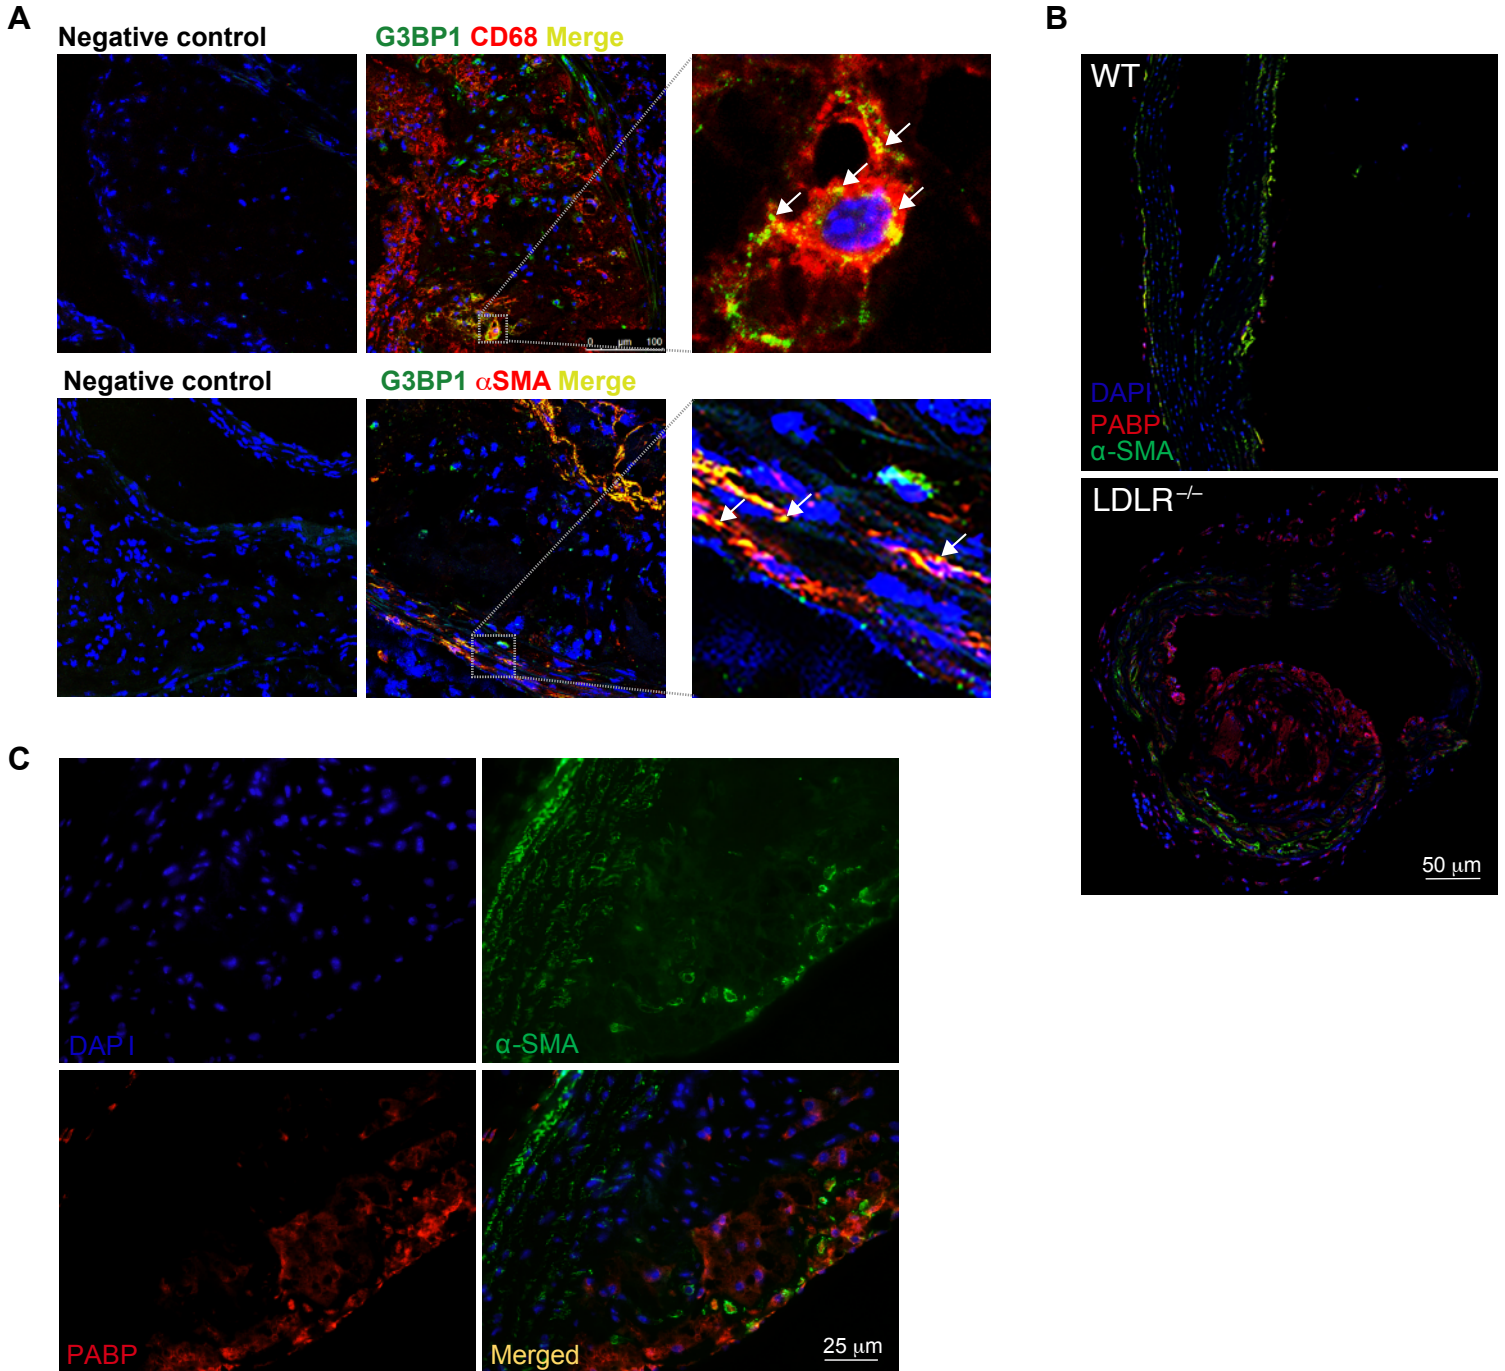

**Supplemental Figure I.** Expression of SG markers in atherosclerotic plaque. (A) G3BP1 costaining with macrophage and VSMC markers in plaque from *Ldlr*<sup>-/-</sup> mice fed a western diet for 14 weeks. (B) Poly-A Binding Protein (PABP) expression in atherosclerotic plaque. Very little PABP was detected in *Ldlr*<sup>-/-</sup> mice fed a normal laboratory diet, but large amount of PABP is detected in plaque from *Ldlr*<sup>-/-</sup> mice fed a western diet for 14 weeks. Magnification 400X. (C) Colocalization PABP and  $\alpha$ -smooth muscle actin in atherosclerotic plaque from *Ldlr*<sup>-/-</sup> mice fed a western diet for 14 weeks. Co-localization of PABP and smooth muscle cells showed that PABP expression was increased specifically in the synthetic intima and cap layer of smooth muscle cells juxtaposed to the plaque, as compared to the quiescent and contractile medial smooth muscle cells in these lesions. Magnification 600X.

## Supplementary Figure II

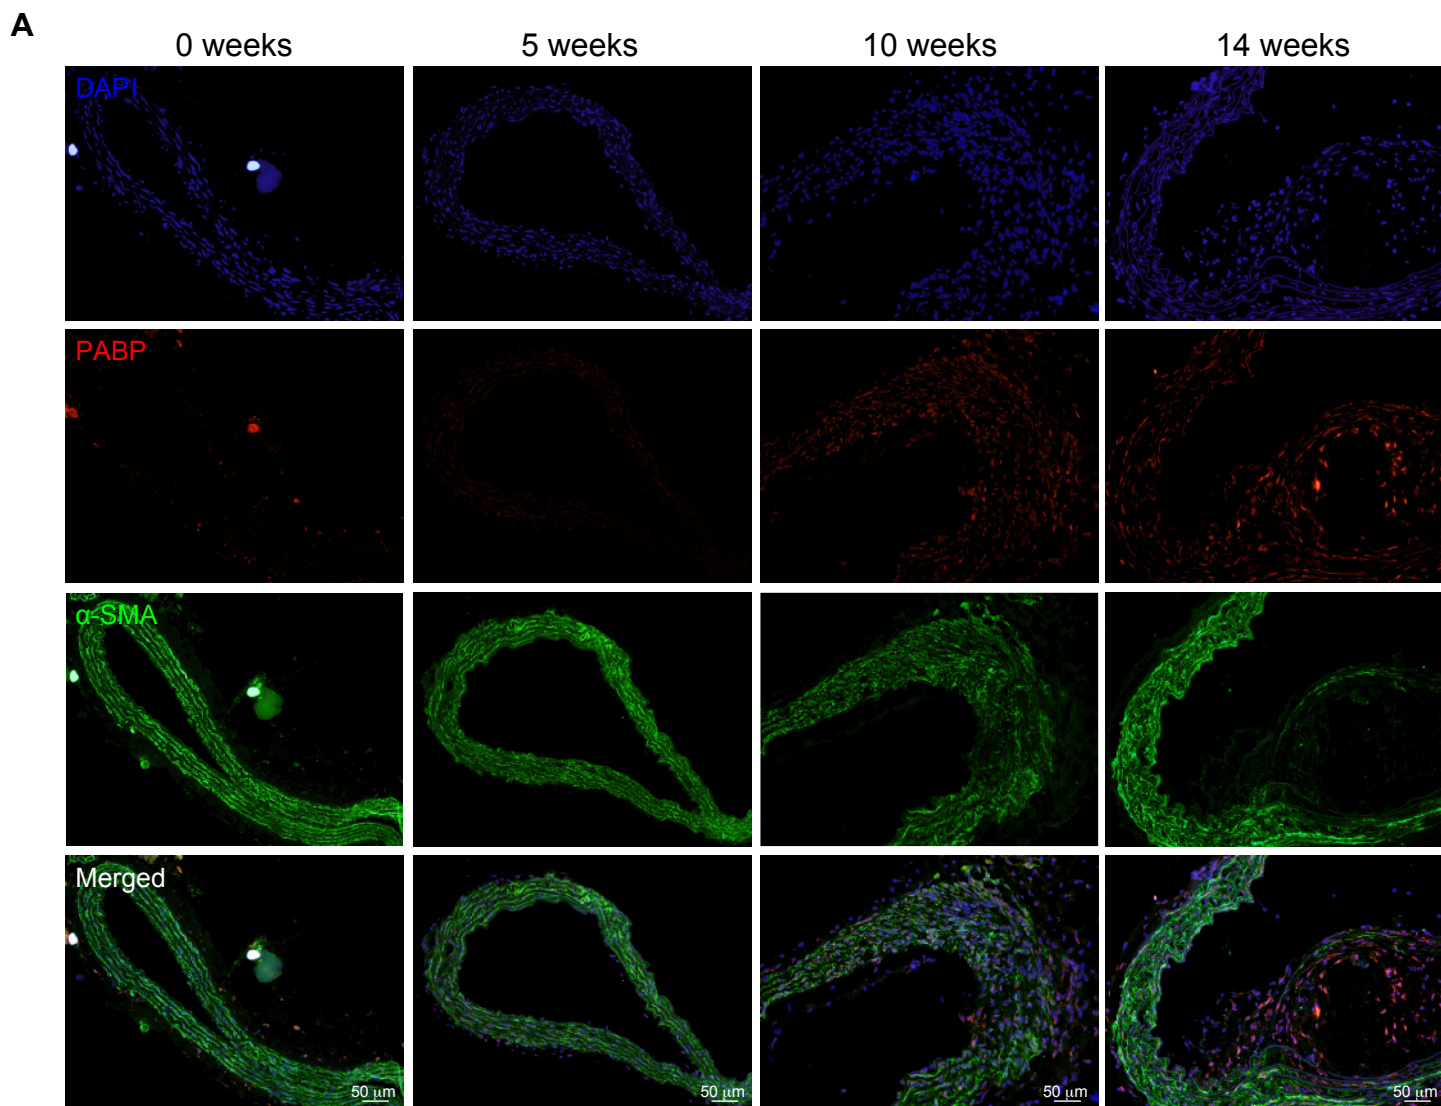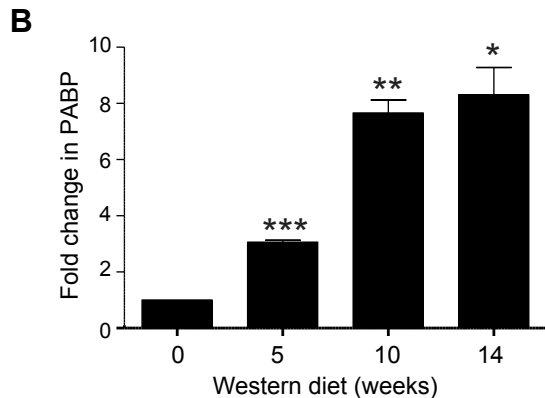

**Supplemental Figure II.** PABP expression correlates with atherogenesis in LDLR<sup>-/-</sup> mice. Cumulative staining of the stress granule-specific marker Poly-A Binding Protein (PABP) with atherosclerosis progression. (A) Representative images of aortic arch sections from Ldlr<sup>-/-</sup> mice fed western diet for 0, 5, 10, and 14 weeks that were immunostained for PABP (red), alpha smooth muscle actin (green), and DAPI (blue). (B) Quantification of PABP staining of aortic arch sections by corrected total cell fluorescence (CTCF). \*P $\leq$ 0.05, \*\* P $\leq$ 0.01, or \*\*\* P $\leq$ 0.001.

### Supplementary Figure III

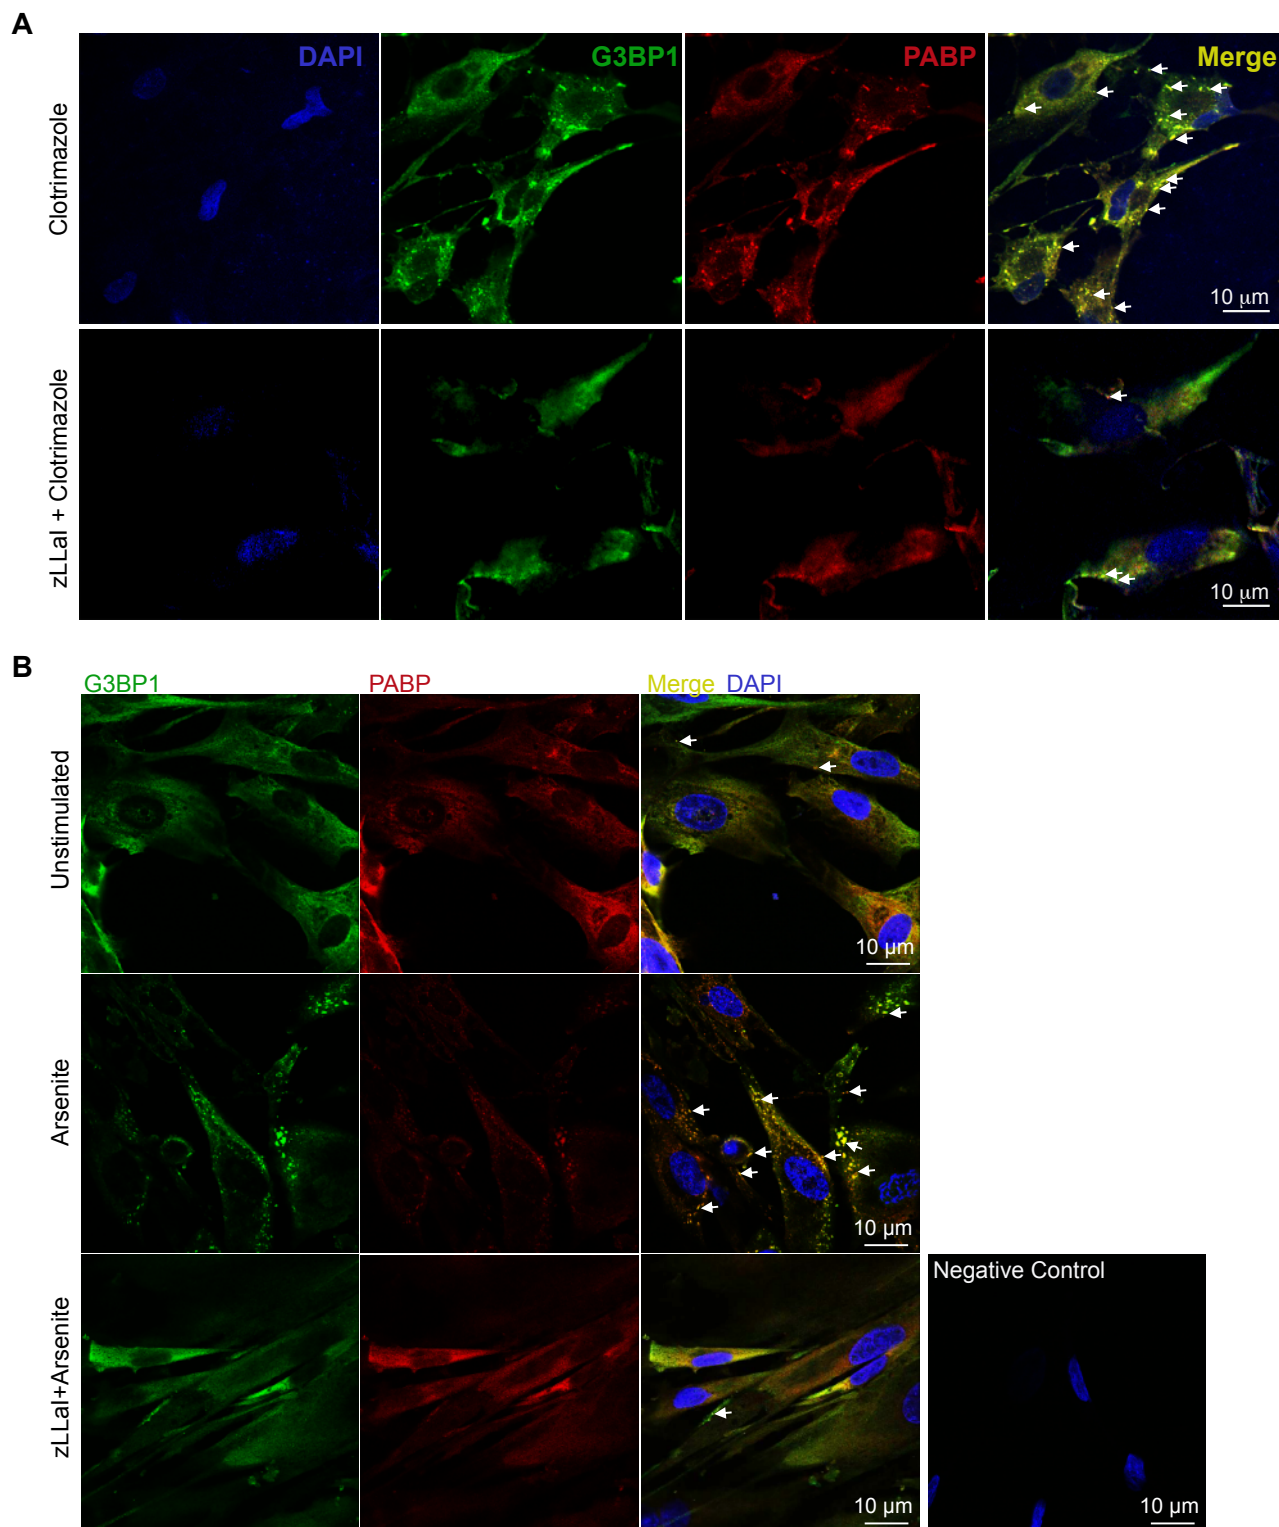

**Supplemental Figure III.** Immunostaining for PABP (red), G3BP (green) and DAPI (blue) in human VSMCs untreated or pretreated with the calpain inhibitor zLLal prior to stimulation with clotrimazole (A), and Arsenite (B). Data are representative of 3 independent experiments.

## Supplementary Figure IV

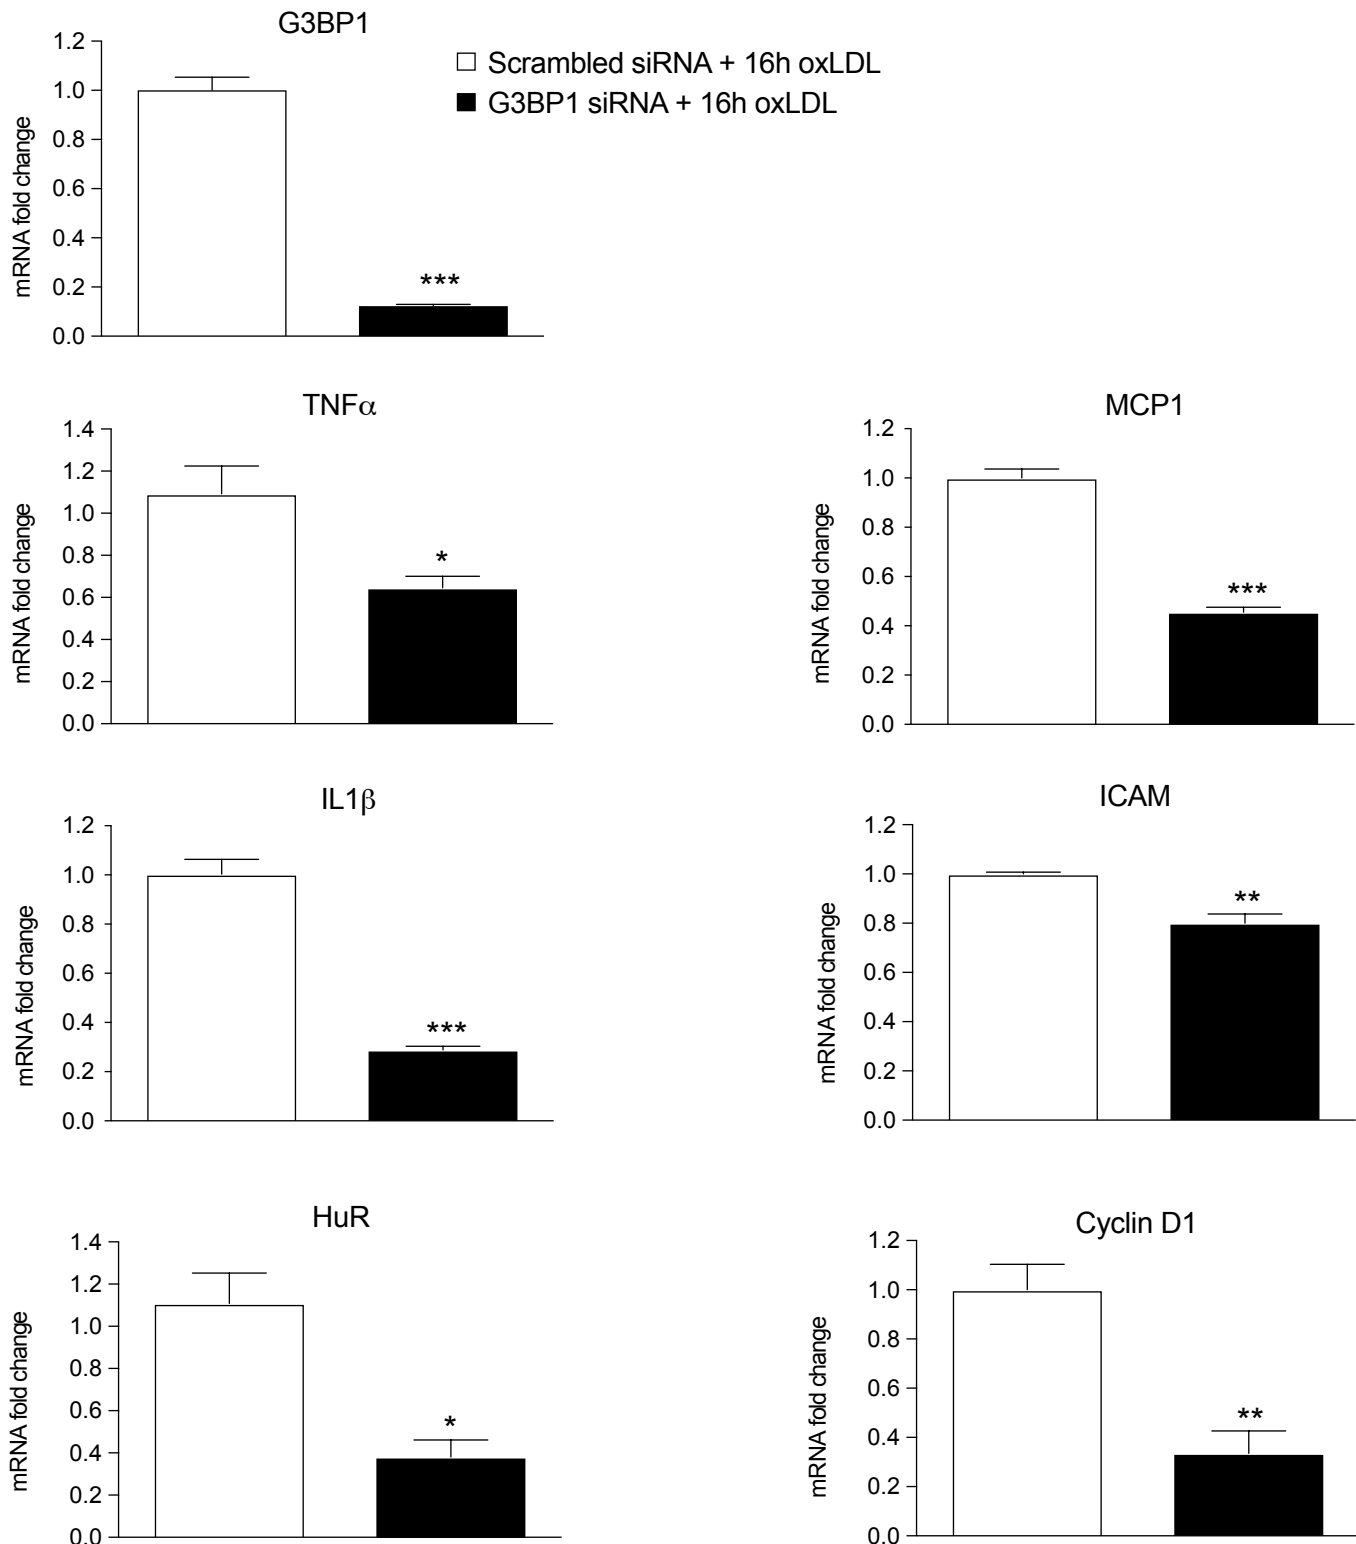

**Supplemental Figure IV.** HVSMCs transfected with siRNA targeting G3BP1 or scrambled control were serum-starved and stimulated with oxLDL for 16 hours, RNA collected, and expression of atherosclerosis-related transcripts were quantitated by PCR. \*P $\leq$ 0.05, \*\* P $\leq$ 0.01, or \*\*\* P $\leq$ 0.001.

## Supplementary Figure V

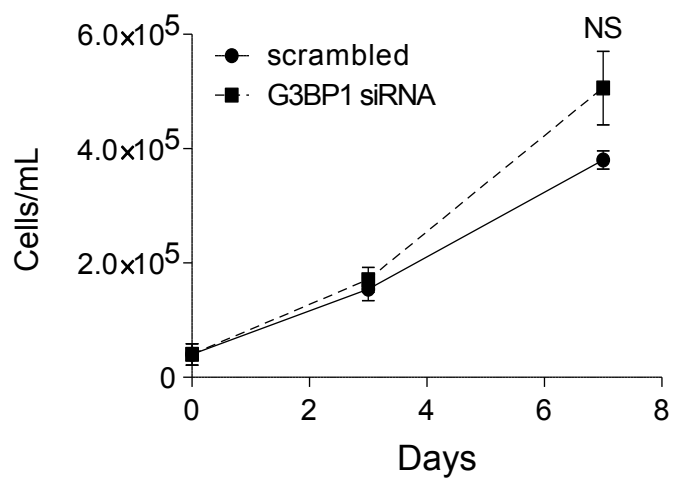

**Supplemental Figure V.** G3BP1 knockdown does not affect VSMC proliferation. HVSMCs were transfected with G3BP1 siRNA or scrambled control siRNA for 48h. Cells were seeded at 10,000 cells/well and counted at days 3 and 7.

## Supplemental Methods

Primers used for quantitative reverse transcription PCR were obtained from Integrated DNA Technologies, Inc., Coralville, Iowa.

|                 |                            |                             |
|-----------------|----------------------------|-----------------------------|
| hGAPDH:         | F: CGAGAGTCAGCCGCATCTT,    | R: CCCCATGGTGTCTGAGCG       |
| hIL-1 $\beta$ : | F: TCCCCAGCCCTTTTGTGGA,    | R: TTAGAACCAAATGTGGCCGTG    |
| hICAM1:         | F: CTCCAATGTGCCAGGCTTG,    | R: GAGTGGGAAAGTGCCATCCT     |
| hHuR:           | F: CCGTCA CAAATGTGAAAGTG,  | R: TCGCGGCTTCTTCATAGTTT     |
| hTNF $\alpha$ : | F: GGTCTACTTTGGGATCATTGC,  | R: GAAGAGGTTGAGGGTGTCTG     |
| hMCP1:          | F: AGCAGAAGTGGGTTTCAGGATT, | R: TGTGGAGTGAGTGTTCAAGTCT   |
| hG3BP1:         | F: AGTTATGGAAACGTGGTGGAG , | R: GACATTCAGACGGACCTCAC     |
| hcyclin D1:     | F: TATTGCGCTGCTACCGTTGA,   | R: CCAATAGCAGCAAACAATGTGAAA |

**Table 1.** Primer pairs used for quantitative RT-PCR.

## Major Resources Tables

### Animals (in vivo studies)

| Species | Vendor or Source       | Background Strain           | Sex |
|---------|------------------------|-----------------------------|-----|
| Mouse   | The Jackson Laboratory | C57BL/6 LDLR <sup>-/-</sup> | M/F |
| Mouse   | The Jackson Laboratory | C57BL/6                     | M/F |

**Animal breeding.** Not applicable

### Antibodies

| Target antigen                 | Vendor or Source             | Catalog #   | Working concentration                              | Lot # (preferred but not required) |
|--------------------------------|------------------------------|-------------|----------------------------------------------------|------------------------------------|
| G3BP1                          | Santa Cruz                   | Sc365338    | WB 6ug/ml, IF 1ug/ul                               |                                    |
| PABP                           | Abcam                        | Ab21060     | WB 6ug/ul, IHC 1ug/ul (cells), 2ug/ml IHC (tissue) |                                    |
| FXR1                           | AbCam                        | Ab50841     | 5ug/ml                                             |                                    |
| HuR                            | AbCam                        | Ab200342    | 1ug/ml                                             |                                    |
| p-eIF2alpha                    | AbCam                        | Ab32157     | 6ug/ml                                             |                                    |
| Total eIF2alpha                | AbCam                        | Ab5369      | 6ug/ml                                             |                                    |
| HSC70                          | Santa Cruz                   | Sc7298      | 0.2ug/ml                                           |                                    |
| Alpha tubulin                  | Sigma Aldrich                | T6074-200UL | 1:1000 of 200ug/ml stock                           |                                    |
| HSP90                          | BD Transduction Laboratories | 610419      | 0.25ug/ml                                          |                                    |
| Alpha smooth muscle actin      | AbCam                        | Ab21027     | 2.5ug/ul                                           |                                    |
| G3BP1                          | AbCam                        | 181150      | 0.7ug/ml                                           |                                    |
| CD68                           | Bio-Rad                      | MCA1957     | 0.25ug/ml                                          |                                    |
| Smooth muscle cell alpha actin | ThermoFisher                 | 53-9760-82  | 1.0ug/ml                                           |                                    |
| G3BP                           | AbCam                        | Ab181150    | 1ug/ml (staining)                                  |                                    |

### Cultured Cells

| Name                               | Vendor or Source                        | Sex (F, M, or unknown) |
|------------------------------------|-----------------------------------------|------------------------|
| Human Vascular Smooth Muscle cells | LifeLine                                | Male                   |
| bone marrow derived macrophages    | From tibiae and femorae of C57Bl/6 mice | Male and Female        |
